# Supplementary material
Source: publisher figshare collection journal article supplement (https://acs.figshare.com/ndownloader/files/8387723)
Supplement: Supplementary file 1 [file 8387723]

# Supporting Information

## CFD-DEM study of mass transfer mechanisms in riser flow

Álvaro E. Carlos Varas, Elias A.J.F. Peters,<sup>\*</sup> and Johannes (Hans) A.M. Kuipers

*Department of Chemical Engineering and Chemistry, Multiphase Reactors Group,  
Eindhoven, Eindhoven University of Technology, THE NETHERLANDS*

E-mail: e.a.j.f.peters@tue.nl

## Model Verification

### Transient diffusion case

In this test case, the implementation of mass diffusion in the CFD-DEM code is verified. Single phase simulations have been performed in a rectangular duct of  $0.2 \times 0.02 \times 0.02$  meters, where the grid length in all dimensions are  $h = 0.005$  m. At the bottom X-Y plane, the gas mass fraction of A is equal to 1, while ‘zero flux boundary conditions’ are applied at the side walls whereas the gas mass fraction of A in the remaining part of the simulation domain is zero. The inflow velocity is zero, so there is a diffusive flux of A throughout the simulation domain. The analytical solution of the axial gas mass fraction profile is determined by the error function (derived from 2<sup>nd</sup> Fick’s law):

$$\frac{w_z - w_0}{w_s - w_0} = 1 - \operatorname{erf}\left(\frac{z}{2\sqrt{D_{AB}t}}\right) \quad (1)$$

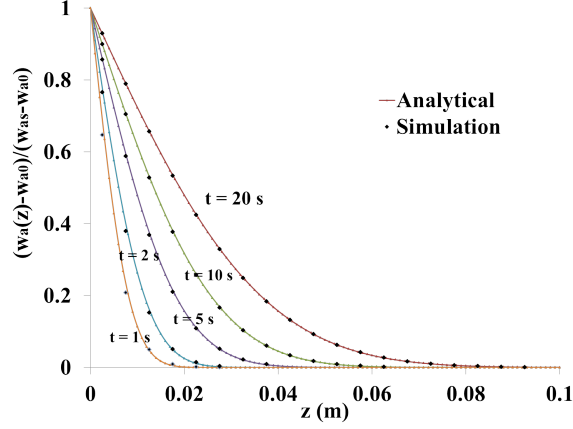

Figure S1: 1D profile of instantaneous gas mass fraction of A.  $h = 0.005$  meters.

It can be observed that the numerical solution is agreeing very well with the analytical results (see Figure S1).

## Graetz-Nusselt test case

The Graetz-Nusselt case is performed in order to verify the correct implementation of mass convective terms of the convection-diffusion equation. In this case, there is an inflow velocity at the bottom plane of the domain and free-slip boundary conditions are applied for the gas phase at the side walls. Concerning the species field, the mass fraction at the bottom plane is equal to 1 and at the side walls equal to zero. So the side walls behave, in this case, as reactive surfaces where component A reacts at infinitely high rate (mass diffusion controls). The verification consists of the comparison of cross-sectional profiles of the gas mass fraction

Table S1: Simulation data.

| Simulation Data       |                                                 |          |                        |
|-----------------------|-------------------------------------------------|----------|------------------------|
| $D_{AB}$              | $2.0 \cdot 10^{-5} \text{ (m/s}^2\text{)}$      | $\rho_g$ | 1 (kg/m <sup>3</sup> ) |
| $\mu$                 | $2.0 \cdot 10^{-5} \text{ (kg/m}\cdot\text{s)}$ | P        | 101325 Pa              |
| $H \times W \times D$ | $0.2 \times 0.02 \times 0.02$                   | U        | 0.03 m/s               |

of A under fully developed flow conditions. To attain fully developed concentration profiles, the inverse of the Graetz number should be higher than 0.1:

$$Gz = \frac{D_{AB} \cdot z}{U \cdot D^2} \geq 0.1 \quad (2)$$

where  $U$  is the gas velocity and  $D$  is the distance between the side walls. According to this criterion, fully developed flow is found at an axial distance  $z = 0.015$  m. The analytical

Table S2: Boundary conditions.

|              |                       |
|--------------|-----------------------|
| Bottom plane | $w_{A,w}=0.0$         |
| Side walls   | $w_{A,c}=1.0$         |
| Top wall     | $\frac{dw_A}{dz}=0.0$ |

cal solution of the mass fraction profile in a squared duct under fully developed conditions is:

$$\frac{w_{wall} - w(y, z)}{w_{wall} - w_{center}} = \left( 1 - \frac{6}{5} \left( \frac{y}{Y} \right)^2 + \frac{1}{5} \left( \frac{y}{Y} \right)^4 \right) \quad (3)$$

where  $Y$  is half distance between the side walls,  $y$  is the distance to  $Y$ .

Under these conditions the analytical solution for the Sherwood number is 2.977. This value was compared to  $Sh$  number computed from simulation data:

$$Sh_w = \frac{M_A D}{w_{A,w} - w_{A,m}} \quad (4)$$

where  $M_A$  is the mass flux towards the side walls,  $w_{A,w}$  the mass fraction of A at the wall,  $w_{A,m}$  the cup-averaged mass fraction of A and  $D$  the distance between the side walls. From Table S3, it can be seen that the error between the simulation result and the analytical solution is very small. Actually this can be significantly reduced when  $h = 0.0012$  m. In Figure S2, the mass fraction profile of component A is plotted and compared to the analytical solution at an axial coordinate where the flow is fully developed. This test case demonstrates

that the implementation of the convective mass transfer terms is correct.

Table S3: Sherwood number of test case.

| $NX \times NY \times NZ$ | $M_A$ (kg/m <sup>2</sup> s) | $w_m$ | Sh    | Sh(an) | Error % |
|--------------------------|-----------------------------|-------|-------|--------|---------|
| $9 \times 9 \times 20$   | $1.89 \cdot 10^{-4}$        | 0.052 | 3.038 | 2.977  | 2.023   |
| $17 \times 17 \times 20$ | $1.97 \cdot 10^{-4}$        | 0.066 | 2.997 | 2.977  | 0.671   |

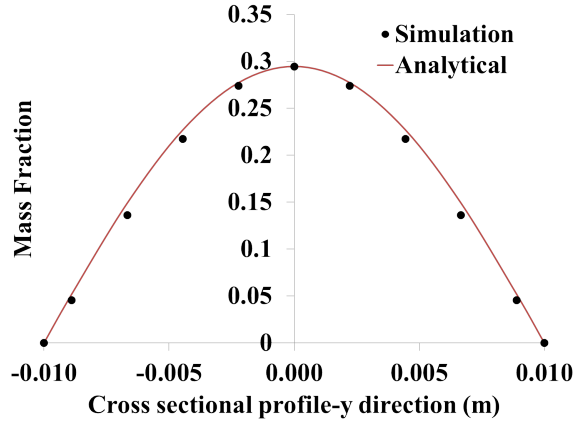

Figure S2: Cross-sectional profile mass fraction of A.

## Chemical reaction in packed bed system

A packed bed reactor is simulated in order to validate the implementation of the chemical conversion due to a catalytic reaction. A mass transfer limited case is simulated, where the particles act as sink points with a mass fraction of component A equal to zero. Free-slip boundary conditions at the side walls are applied. The dimensions of the packed bed system are  $0.2 \times 0.02 \times 0.02$  meter. The cell numbers are  $50 \times 5 \times 5$ . The gas density and viscosity are  $1.2 \text{ kg/m}^3$  and  $2.0 \cdot 10^{-5} \text{ kg/(m}\cdot\text{s)}$  respectively. The bed height is equal to 0.1 meter, and the bed porosity is equal to 0.9345. In this simulation pure A gas is injected through the bottom plane of the simulation domain at a gas superficial velocity of 4 m/s. Component A converts due to a fast reaction at the particle surface. Thus, the behavior of this system

can be described by a 1D plug flow model where the reaction rate is dictated by the mass transfer coefficient (Gunn correlation) which is approximately 0.238 m/s.

In this case, the analytical solution is :

$$\frac{w_A}{w_{A,0}} = \exp\left(-\frac{(1-\epsilon)a_vk_{mt}z}{U}\right) \quad (5)$$

The 1D profile of the gas mass fraction of component A at steady state is compared to the analytical solution in Figure S3. We can see that results almost overlap and the difference is negligible.

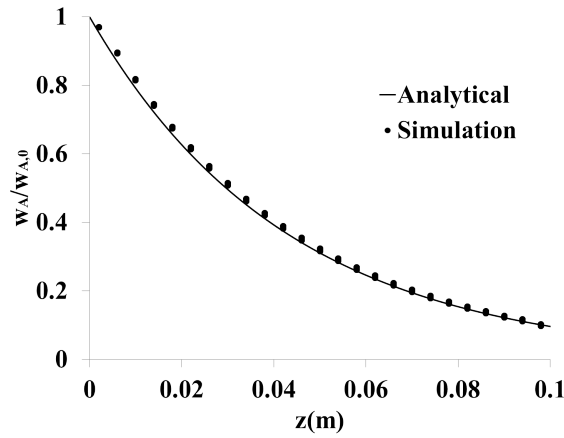

Figure S3: Validation of source term implementation.

## Mass transfer contributions under riser flow conditions.

In this table, an overview of relevant research related to mass transfer on riser flows is presented. In the remarks column, a comment has been added to categorize each one of these contributions by the main topic related to mass transfer that is covered in these works or specifying a different fluidization regime than riser flow.

Table S4: Mass transfer contributions under riser flow conditions.

| Authors                                      | Modelling/Experimental | Physical/chemical system    | Remarks         |
|----------------------------------------------|------------------------|-----------------------------|-----------------|
| Resnick and White, 1949 <sup>1</sup>         | Experimental           | Naphthalene Sublimation     | Bubbling        |
| Fryer and Potter, 1976 <sup>2</sup>          | Experimental           | Ozone Decomposition         | Bubbling        |
| Dry et al., 1987 <sup>3</sup>                | Experimental           | Heat pulse tracer           | G-S             |
| Watanabe et al., 1991 <sup>4</sup>           | Experimental           | Heat transfer               | G-S             |
| Kagawa et al., 1991 <sup>5</sup>             | Experimental           | Ozone Decomposition         | G-S             |
| Jiang et al., 1991 <sup>6</sup>              | Experimental           | Ozone Decomposition         | G-S             |
| Pagliolico et al., 1992 <sup>7</sup>         | C/A Exp.               | Ozone Decomposition         | Validation      |
| Sun and Grace, 1992 <sup>8</sup>             | Experimental           | Ozone Decomposition         | Effect of PSD   |
| Kumar et al., 1992 <sup>9</sup>              | Experimental           | Naphthalene Sublimation     | Mass transfer   |
| Ouyang et al., 1993 <sup>10</sup>            | Experimental           | Ozone Decomposition         | G-S             |
| Vollert and Werther, 1994 <sup>11</sup>      | C/A - Exp.             | NO Oxidation                | Validation      |
| Fligner, 1994 <sup>12</sup>                  | C/A                    | Hydrodynamics               | Validation      |
| Van der Ham et al. 1994 <sup>13</sup>        | Experimental           | Naphthalene Adsorption      | Mass transfer   |
| Li and Kwauk, 1994 <sup>14</sup>             | EMMS                   | Hydrodynamics               | Clusters        |
| Koenigsdorff and Werther, 1995 <sup>15</sup> | C/A                    | Hydrodynamics               | Validation      |
| Ouyang et al., 1995 <sup>16</sup>            | Experimental           | Ozone Decomposition         | G-S             |
| Pugsley, 1996 <sup>17</sup>                  | C/A                    | Hydrodynamics               | Validation      |
| Schöenfelder, 1996 <sup>18</sup>             | C/A - Exp.             | Ozone Decomposition         | Validation      |
| Zethraeus, 1996 <sup>19</sup>                | C/A                    | Hydrodynamics               | Validation      |
| Kunii and Levenspiel, 1997 <sup>20</sup>     | C/A                    | Hydrodynamics               | G-S             |
| Venderbosch, 1999 <sup>21</sup>              | Experimental           | CO Oxidation                | Sh overall      |
| Zhu et al., 1999 <sup>22</sup>               | Experimental           | Heat transfer               | G-S-downer      |
| Contractor et al., 2000 <sup>23</sup>        | Experimental           | Argon gas tracer            | G-S             |
| Bolland et al., 2001 <sup>24</sup>           | Experimental           | Ozone Decomposition         | Sh overall      |
| Wang and Li, 2002 <sup>25</sup>              | TFM/EMMS- Exp.         | Naphthalene Sublimation     | Validation      |
| Subbarao and Gambhir, 2002 <sup>26</sup>     | Experimental           | Naphthalene Adsorption      | Sh overall      |
| Scala, 2007 <sup>27</sup>                    | Experimental           | CO Oxidation                | Bubbling        |
| Subbarao, 2008 <sup>28</sup>                 | Cluster model          | Mass Transfer               | Cluster model   |
| Dong et al., 2008a <sup>29</sup>             | TFM/EMMS               | Naphthalene Sublimation     | Validation      |
| Dong et al., 2008b <sup>30</sup>             | TFM/EMMS               | Ozone Decomposition         | Validation      |
| Chalermisinsuwan et al., 2009 <sup>31</sup>  | TFM/EMMS               | Ozone Decomposition         | Sh overall      |
| Prajongkan et al., 2009 <sup>32</sup>        | TFM/EMMS               | Ozone Decomposition         | Sh overall      |
| Breault et al., 2009 <sup>33</sup>           | Experimental           | Naphthalene Sublimation     | Sh cluster-bulk |
| Shuyan et al., 2009 <sup>34</sup>            | CFD-DEM                | Naphthalene Sublimation     | Particle-Sh     |
| Hou et al., 2010 <sup>35</sup>               | TFM/EMMS               | Ozone Decomposition         | Validation      |
| Wang et al., 2010 <sup>36</sup>              | TFM/EMMS               | Hydrodynamics-Mass Transfer | Review          |
| Ge et al., 2011 <sup>37</sup>                | TFM/EMMS               | Hydrodynamics-Mass Transfer | Review          |
| Kashyap et al., 2012 <sup>38</sup>           | TFM/EMMS-Exp.          | Ozone Decomposition         | Sh overall      |
| Chen et al., 2012 <sup>39</sup>              | TFM/EMMS               | Gas desulfurization         | Validation      |
| Hou et al., 2013 <sup>40</sup>               | TFM/EMMS- Exp.         | CO oxidation                | Validation      |
| Li et al., 2013 <sup>41</sup>                | Experimental           | Ozone Decomposition         | G-S             |
| Wang et al., 2015 <sup>42</sup>              | Experimental           | Ozone Decomposition         | G-S             |

\* G-S: Gas-solid contact efficiency. PSD: Particle size distribution.

## References

- (1) Resnick, W.; White, R. R. Mass transfer in systems of gas and fluidized solids. *Chem. Eng. Prog.* **1949**, *45*, 377–390.
- (2) Fryer, C.; Potter, O. E. Experimental investigation of models for fluidized bed catalytic reactors. *AIChE J.* **1976**, *22*, 38–47.
- (3) Dry, R. J.; Christensen, I. N.; White, C. C. Gassolids contact efficiency in a high-velocity fluidised bed. *Powder Technol.* **1987**, *52*, 243–250.
- (4) Watanabe, T.; Chen, Y.; Hasatani, M.; Naruse, I. Gas-solid interfacial heat transfer in circulating fluidized beds. *Heat Transfer-Japanese Research;(United States)* **1993**, *22*.
- (5) Kagawa, H.; Mineo, H.; Yamazaki, R.; Yoshida, K. A gas-solid contacting model for fast fluidized bed. *Circulating fluidized bed technology III* **1991**, 551–556.
- (6) Jiang, P.; Bi, H.; Jean, R.-H.; Fan, L.-S. Baffle effects on performance of catalytic circulating fluidized bed reactor. *AIChE J.* **1991**, *37*, 1392–1400.
- (7) Pagliolico, S.; Tiprigan, M.; Rovero, G.; Gianetto, A. Pseudo-homogeneous approach to CFB reactor design. *Chem. Eng. Sci.* **1992**, *47*, 2269–2274.
- (8) Sun, G.; Grace, J. R. Effect of particle size distribution in different fluidization regimes. *AIChE J.* **1992**, *38*, 716–722.
- (9) Kumar, H.; Sublette, K.; Shah, Y. Effect of high voidage on mass transfer coefficient in a fluidized bed. *Chem. Eng. Commun.* **1993**, *121*, 157–163.
- (10) Ouyang, S.; Lin, J.; Potter, O. E. Ozone decomposition in a 0.254 m diameter circulating fluidized bed reactor. *Powder Technol.* **1993**, *74*, 73–78.
- (11) Vollert, J.; Werther, J. Mass transfer and reaction behaviour of a circulating fluidized bed reactor. *Chem. Eng. Technol.* **1994**, *17*, 201–209.

- (12) Fligner, M.; Schipper, P. H.; Sapre, A. V.; Krambeck, F. J. Two phase cluster model in riser reactors: Impact of radial density distribution on yields. *Chem. Eng. Sci.* **1994**, *49*, 5813–5818.
- (13) Van der Ham, A. G. J.; Prins, W.; Van Swaaij, W. P. M. A small-scale regularly packed circulating fluidized bed: Part II: Mass transfer. *Powder Technol.* **1994**, *79*, 29–41.
- (14) Li, J.; Kwauk, M. *Particle-fluid two-phase flow: the energy-minimization multi-scale method*; Metallurgical Industry Press, 1994.
- (15) Koenigsdorff, R.; Werther, J. Gas-solids mixing and flow structure modeling of the upper dilute zone of a circulating fluidized bed. *Powder Technol.* **1995**, *82*, 317–329.
- (16) Ouyang, S.; Li, X.-G.; Potter, O. E. Circulating fluidized bed as a catalytic reactor: experimental study. *AIChE J.* **1995**, *41*, 1534–1542.
- (17) Pugsley, T. S.; Berruti, F. A predictive hydrodynamic model for circulating fluidized bed risers. *Powder Technol.* **1996**, *89*, 57–69.
- (18) Schoenfelder, H.; Kruse, M.; Werther, J. Two-dimensional model for circulating fluidized-bed reactors. *AIChE J.* **1996**, *42*, 1875–1888.
- (19) Zethraeus, B. A theoretical model for gas-particle contact efficiency in circulating fluid bed risers. *Powder Technol.* **1996**, *88*, 133–142.
- (20) Kunii, D.; Levenspiel, O. Circulating fluidized-bed reactors. *Chem. Eng. Sci.* **1997**, *52*, 2471–2482.
- (21) Venderbosch, R. H.; Prins, W.; Van Swaaij, W. P. M. Mass transfer and influence of the local catalyst activity on the conversion in a riser reactor. *Can. J. Chem. Eng.* **1999**, *77*, 262–274.
- (22) Zhu, J.-X.; Ma, Y.; Zhang, H. Gas-solids contact efficiency in the entrance region of a co-Current downflow fluidized bed (downer). *Chem. Eng. Res. Des.* **1999**, *77*, 151–158.



- (23) Contractor, R.; Dry, R. J.; White, C.; Mao, Q. M.; Konstantinidis, S.; Potter, O. E. Circulating fluidized beds diameter, solids hold-up, axial gas-mixing, and contact efficiency. *Powder Technol.* **2000**, *111*, 132–144.
- (24) Bolland, O.; Nicolai, R. Describing mass transfer in circulating fluidized beds by ozone decomposition. *Chem. Eng. Commun.* **2001**, *187*, 1–21.
- (25) Li, J.; Wang, L. Concentration distributions during mass transfer in circulating fluidized beds. Proceedings of the 7th International Conference on Circulating Fluidized Beds. 2002.
- (26) Subbarao, D.; Gambhir, S. Gas to particle mass transfer in risers. Proceedings of 7th International Circulating Fluidized Beds Conference, Canadian Society for Chemical Engineering, Niagara Falls. 2002; pp 97–104.
- (27) Scala, F. Mass transfer around freely moving active particles in the dense phase of a gas fluidized bed of inert particles. *Chem. Eng. Sci.* **2007**, *62*, 4159–4176.
- (28) Subbarao, D. A cluster model for mass transfer in risers. *Sci. Techno* **2008**, *3*, 131.
- (29) Dong, W.; Wang, W.; Li, J. A multiscale mass transfer model for gas–solid riser flows: Part I Sub-grid model and simple tests. *Chem. Eng. Sci.* **2008**, *63*, 2798–2810.
- (30) Dong, W.; Wang, W.; Li, J. A multiscale mass transfer model for gas–solid riser flows: Part II Sub-grid simulation of ozone decomposition. *Chem. Eng. Sci.* **2008**, *63*, 2811–2823.
- (31) Chalermsoinsuwan, B.; Piumsomboon, P.; Gidaspow, D. Kinetic theory based computation of PSRI riser: Part II Computation of mass transfer coefficient with chemical reaction. *Chem. Eng. Sci.* **2009**, *64*, 1212–1222.
- (32) Prajongkan, Y.; Piumsomboon, P.; Chalermsoinsuwan, B. Computation of mass transfer coefficient and Sherwood number in circulating fluidized bed downer using compu-

- tational fluid dynamics simulation. *Chem. Eng. Process. Process Intensif.* **2012**, *59*, 22–35.
- (33) Breault, R. W.; Guenther, C. P. Mass transfer in the core-annular and fast fluidization flow regimes of a CFB. *Powder Technol.* **2009**, *190*, 385–389.
- (34) Shuyan, W.; Xiang, L.; Huilin, L.; Long, Y.; Dan, S.; Yurong, H.; Yonglong, D. Numerical simulations of flow behavior of gas and particles in spouted beds using frictional-kinetic stresses model. *Powder Technol.* **2009**, *196*, 184–193.
- (35) Hou, B.; Li, H. Relationship between flow structure and transfer coefficients in fast fluidized beds. *Chem. Eng. J.* **2010**, *157*, 509–519.
- (36) Wang, W.; Lu, B.; Zhang, N.; Shi, Z.; Li, J. A review of multiscale CFD for gas–solid CFB modeling. *Int. J. Multiphase Flow* **2010**, *36*, 109–118.
- (37) Ge, W.; Wang, W.; Yang, N.; Li, J.; Kwauk, M.; Chen, F.; Chen, J.; Fang, X.; Guo, L.; He, X. Meso-scale oriented simulation towards virtual process engineering (VPE) the EMMS paradigm. *Chem. Eng. Sci.* **2011**, *66*, 4426–4458.
- (38) Kashyap, M.; Gidaspow, D. Measurements and computation of low mass transfer coefficients for FCC particles with ozone decomposition reaction. *AIChE J.* **2012**, *58*, 707–729.
- (39) Chen, C.; Li, F.; Qi, H. Modeling of the flue gas desulfurization in a CFB riser using the Eulerian approach with heterogeneous drag coefficient. *Chem. Eng. Sci.* **2012**, *69*, 659–668.
- (40) Hou, B.; Tang, H.; Zhang, H.; Shao, G.; Li, H.; Zhu, Q. Experimental and theoretical investigation of mass transfer in a circulating fluidized bed. *Chem. Eng. Sci.* **2013**, *102*, 354–364.

- (41) Li, D.; Ray, A. K.; Ray, M. B.; Zhu, J. Catalytic reaction in a circulating fluidized bed riser: Ozone decomposition. *Powder Technol.* **2013**, *242*, 65–73.
- (42) Wang, C.; Zhu, J.; Barghi, S. Performance evaluation of high density riser and downer: Experimental study using ozone decomposition. *Chem. Eng. J.* **2015**, *262*, 478–489.
